# Supplementary figures and images for: Dual inhibition of REV-ERBβ and autophagy as a novel pharmacological approach to induce cytotoxicity in cancer cells
Source: PubMed Central journal article supplement — Oncogene. 2014 Jul 14;34(20):2597–608. doi: 10.1038/onc.2014.203 (PMC4761647; doi:10.1038/onc.2014.203), 2014-07-14

**a**

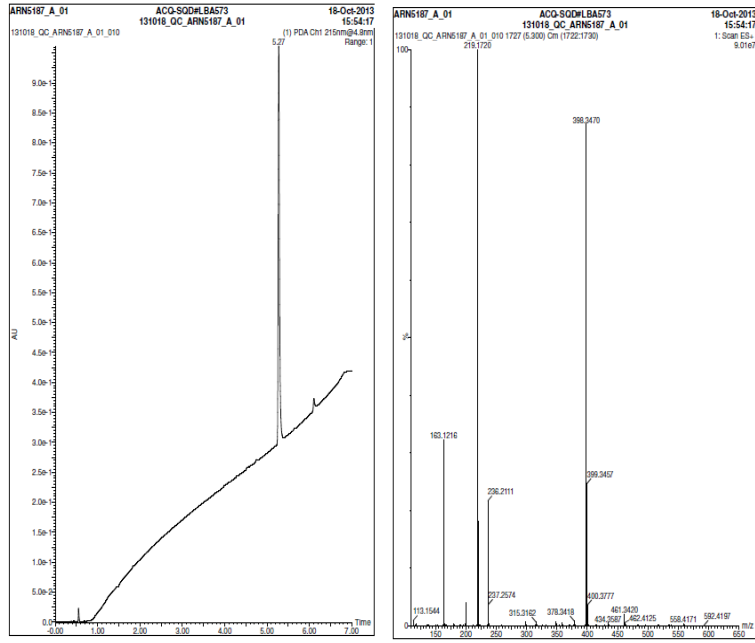

**b**

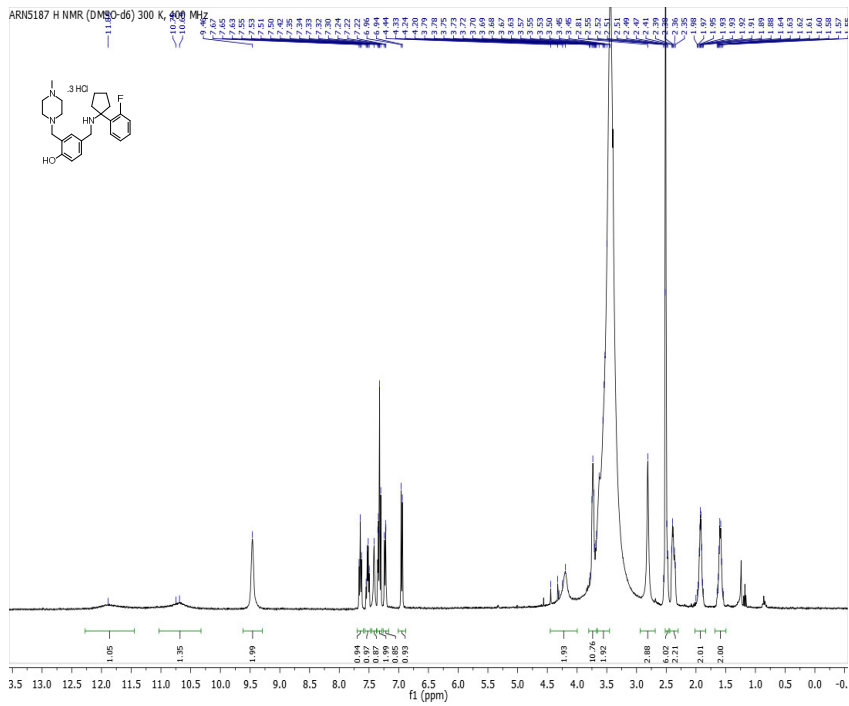

Supplement: onc2014203x15.pdf [file onc2014203x15.pdf]

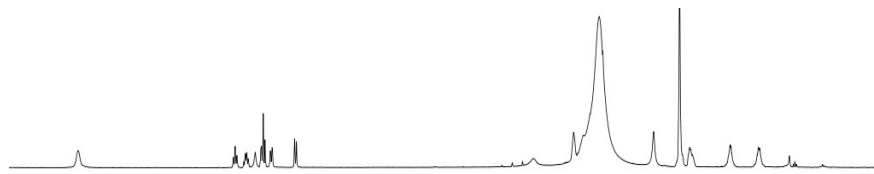

ARN5187 HSQC (DMSO-d6), 300 K, 400 MHz

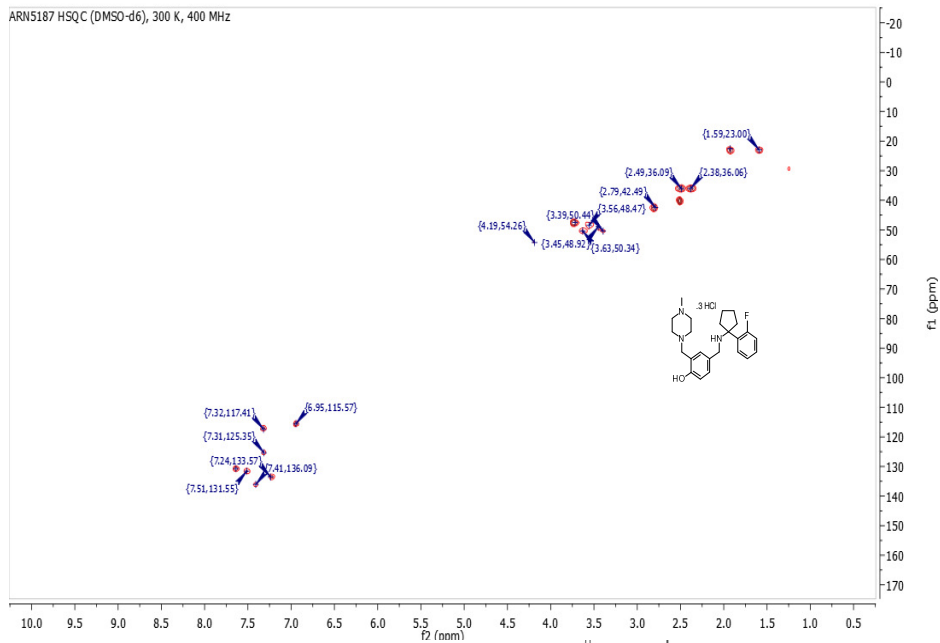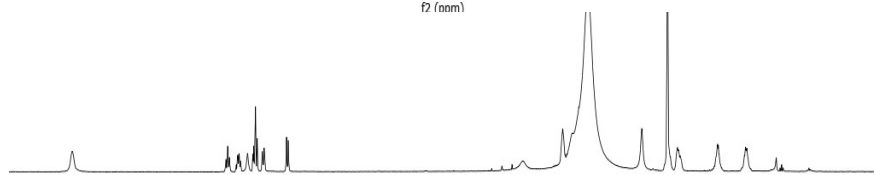

ARN5187 HMBC (DMSO), 300 K, 400 MHz

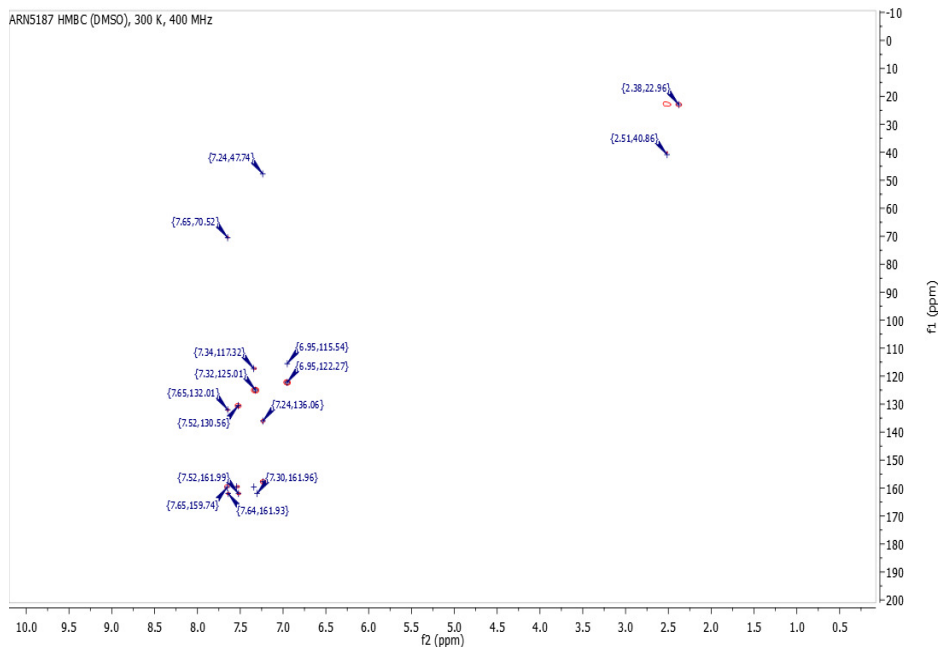

Supplement: onc2014203x16.pdf [file onc2014203x16.pdf]
